# Supplementary material
Source: PubMed Central journal article supplement (PMC3074276)
Supplement: NIHMS266858-supplement-Supp1.pdf [file NIHMS266858-supplement-Supp1.pdf]

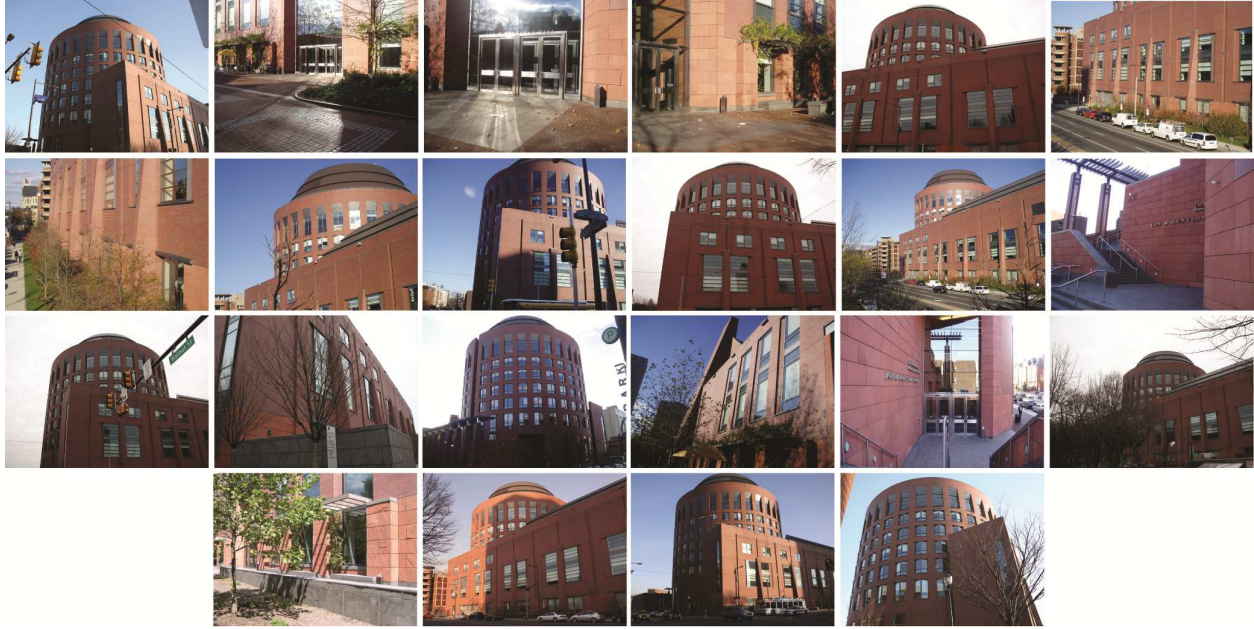

**Supplementary Figure 1.** Examples of the twenty-two images of one landmark, Huntsman Hall. Each image was shown only once in the experiment.

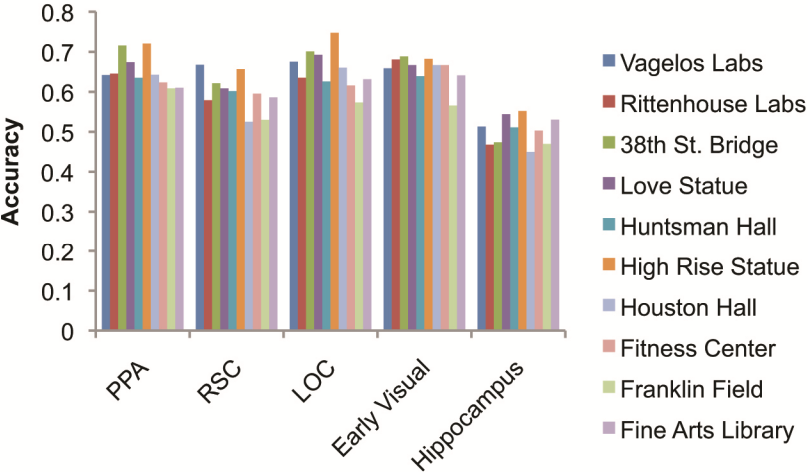

**Supplementary Figure 2.** Decoding of individual landmarks using MVPA. Decoding accuracy within functionally and anatomically defined ROIs, displayed separately for each of the 10 landmarks. Chance performance is 0.5.
